# Supplementary material for: Burden, Antibiotic Resistance, and Clonality of Shigella spp. Implicated in Community-Acquired Acute Diarrhoea in Lilongwe, Malawi
Source: MDPI journal article supplement (doi:10.3390/tropicalmed6020063), 2021-04-28
Supplement: s1 [file s1]

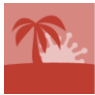

Article

# Burden, antibiotic resistance, and clonality of *Shigella flexneri* implicated in community-acquired acute diarrhoea in Lilongwe, Malawi

Abel F.N.D. Phiri <sup>1,2</sup>, Akebe Luther King Abia <sup>1</sup>, Daniel Gyamfi Amoako <sup>1</sup>, Rajab Mkakosya <sup>3</sup>,  
Sabiha Y. Essack <sup>1</sup> and Gunnar Skov Simonsen <sup>4,5\*</sup>

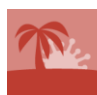

**Table S1.** Primer sequences for detection of ampicillin, sulfonamide and trimethoprim resistant genes in *Shigella* spp.

| Gene target | Primer  | Sequence (5' to 3')         | Annealing Temp (°C) | Reference                     |
|-------------|---------|-----------------------------|---------------------|-------------------------------|
| OXA-1 group | OXA-1F  | ACACAATACATATCAACTTCGC      | 55                  | Ouellette & Bissonnette, 1987 |
|             | OXA-1R  | AGTGTGTTTAGAATGGTGATC       |                     |                               |
| OXA-2 group | OXA-2F  | ATGGCAATCCGAATCTTCG         | 55                  | Chmelnitsky et al., 2005      |
|             | OXA-2R  | TTATCGCGCAGCGTCCGAG         |                     |                               |
| dfrA1       | dfrA1F  | ACGGATCCTGGCTGTTGGTTGGACGC  | 58                  | Lombardo et al., 2016         |
|             | dfrA1R  | CGGAATTCACCTTCCGGCTCGATGTC  |                     |                               |
| dfrA12      | dfrA12F | GTTGCGGTCCAGACATAC          | 58                  | Thungpathra et al., 2002      |
|             | dfrA12R | CCGCCACCAGACACTA            |                     |                               |
| dfrA17      | dfrA17F | TCGAGCTTCATGCCATTT          | 58                  | Al-Assil, 2013                |
|             | dfrA17R | TCTTCCATGCCATTCTGC          |                     |                               |
| sul1        | sul1F   | CTTCGATGAGAGCCGGCGGC        | *                   | Ruiz, 2002                    |
|             | sul1R   | GCAAGGCGGAAACCCGCGCC        |                     |                               |
| sul2        | sul2F   | TCGTCAACATAACCTCGGACAG      | *                   | Byne-Bailey, 2009             |
|             | sul2R   | GTTGCGTTTGATACCGGCAC        |                     |                               |
| sul3        | sul3F   | GAGCAAGATTTTTGGAATCG        | *                   | Perreten, 2003                |
|             | sul3R   | CATCTGCAGCTAACCTAGGGCTTTGGA |                     |                               |

\* Annealing temperatures were optimised at 62 °C as reported in the manuscript



**Table S2.** Primer sequences for detecting virulence genes in *Shigella* spp. isolates.

| Gene target    | Primer         | Sequence (5' to 3')                                           | Product size (bp) | Tm (°C) |
|----------------|----------------|---------------------------------------------------------------|-------------------|---------|
| <i>Set 1 A</i> | <i>ShET-1A</i> | F: TCACGCTACCATCAAAGA<br>R: TATCCCCCTTTGGTGGTA                | 309               | 55      |
| <i>Set 1B</i>  | <i>ShET-1B</i> | F: GTGAACCTGCTGCCGATATC<br>R: ATTTGTGGATAAAAATGACG            | 147               | 55      |
| <i>sat</i>     | <i>Sat1</i>    | F: ACTGGCGGACTCATGCTGT<br>R: AACCTGTAGAAGACTGAGC              | 387               | 55      |
| <i>Ial</i>     | <i>Ial1</i>    | F; CTGGATGGTATGGTGAGG<br>R; GGAGGCCAACAATTATTTCC              | 320               | 58      |
| <i>ipaH</i>    | <i>Shig1</i>   | F: TGGAAAACTCAGTGCCTCT<br>R: CCAGTCCGTAAATTCATTCT             | 423               | 58      |
| <i>virA</i>    | <i>virA</i>    | F: CTGCATTCTGGCAATCTCTTCACATC<br>R-TGATGAGCTAACTTCGTAAGCCCTCC | 215               | 58      |
| <i>Stx</i>     | <i>Stx1</i>    | F: CAGTTAATGTGGTTGCGAAG<br>R: CTGCTAATAGTTCTGCGCATC           | 895               | 60      |
| <i>Sen</i>     | <i>ShET2</i>   | F: ATGTGCCTGCTATTATTTAT<br>R: CATAATAATAAGCGGTCAGC            | 799               | 60      |
| <i>ipaBCD</i>  | <i>ipaBCD</i>  | F: GCTATAGCAGTGACATGG<br>R: ACGAGTTCGAAGCACTC                 | 612               | 60      |

Source: Yaghoubi, et al., 2017

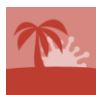

**Table S3.** Detection of *sul*, *dfrA* and *OXA* genes in phenotypically resistant isolates.

| Isolate number | Location     | Resistance genes |             |             |              |               |               |              |              |
|----------------|--------------|------------------|-------------|-------------|--------------|---------------|---------------|--------------|--------------|
|                |              | <i>sul1</i>      | <i>sul2</i> | <i>sul3</i> | <i>dfrA1</i> | <i>dfrA12</i> | <i>dfrA17</i> | <i>OXA-1</i> | <i>OXA-2</i> |
| 1              | Area 36      | +                | +           | +           | -            | +             | +             | -            | -            |
| 2              | Area 46      | +                | +           | +           | -            | +             | +             | -            | -            |
| 3              | Area 25      | +                | +           | -           | -            | +             | +             | -            | -            |
| 4              | Chinsapo     | +                | +           | +           | -            | +             | +             | -            | -            |
| 5              | Kawale       | +                | +           | +           | -            | +             | +             | -            | -            |
| 6              | Mchesi       | +                | +           | +           | -            | +             | +             | -            | -            |
| 7              | Area 24      | +                | +           | +           | -            | +             | +             | -            | -            |
| 8              | Kawale       | +                | +           | +           | -            | +             | +             | -            | -            |
| 9              | Mtsiliza     | +                | +           | +           | -            | +             | +             | -            | -            |
| 10             | Chinsapo     | +                | +           | -           | -            | -             | -             | -            | -            |
| 11             | Area 23      | +                | +           | -           | -            | -             | -             | -            | -            |
| 12             | Chinsapo     | -                | -           | -           | -            | -             | -             | -            | -            |
| 13             | Kawale 2     | +                | +           | +           | -            | +             | +             | -            | -            |
| 14             | Mchesi       | +                | +           | -           | -            | +             | -             | -            | -            |
| 15             | Likuni       | +                | +           | +           | -            | +             | +             | -            | -            |
| 16             | Area 24      | +                | +           | -           | -            | +             | +             | -            | -            |
| 17             | Chinsapo     | +                | +           | -           | -            | +             | -             | -            | -            |
| 18             | Area 36      | +                | +           | +           | -            | +             | +             | -            | -            |
| 19             | Chinsapo     | -                | +           | -           | -            | +             | +             | -            | -            |
| 20             | Biwi         | +                | +           | -           | -            | -             | -             | -            | -            |
| 21             | Area 24      | -                | -           | -           | -            | -             | -             | -            | -            |
| 22             | Area 36      | -                | -           | -           | -            | -             | -             | -            | -            |
| 23             | Area 36      | +                | +           | +           | -            | +             | +             | -            | -            |
| 24             | Chinsapo     | +                | +           | -           | -            | +             | -             | -            | -            |
| 25             | Area 23      | +                | +           | +           | -            | -             | +             | -            | -            |
| 26             | Chinsapo     | +                | +           | +           | -            | +             | +             | -            | -            |
| 27             | Area 36      | +                | +           | -           | -            | +             | +             | -            | -            |
| 28             | Area 1       | -                | +           | +           | -            | +             | +             | -            | -            |
| 29             | Mtsiliza     | +                | +           | -           | -            | +             | -             | -            | -            |
| 30             | Area 46      | +                | +           | -           | -            | +             | -             | -            | -            |
| 31             | Area 36      | -                | -           | -           | -            | -             | -             | -            | -            |
| 32             | Chigwirizano | +                | -           | -           | -            | -             | -             | -            | -            |
| 33             | Area 46      | +                | +           | +           | -            | +             | -             | -            | -            |
| 34             | Mtandile     | -                | -           | -           | -            | -             | -             | -            | -            |
| <b>Total</b>   |              | <b>27</b>        | <b>28</b>   | <b>7</b>    | <b>0</b>     | <b>24</b>     | <b>19</b>     | <b>0</b>     | <b>0</b>     |

+ = gene detected, - = gene not detected
